1 Retrospective Analysis of Interventions to Epidemics using Dynamic Simulation of Population  
2 Behavior

3  
4

5 Jenna Osborn  
6 Division of Applied Mechanics, U. S. FDA/CDRH  
7 Silver Spring, MD 20993 USA  
8 Jenna.osborn@fda.hhs.gov

9

10 Shayna Berman  
11 Division of Applied Mechanics, U. S. FDA/CDRH  
12 Silver Spring, MD 20993 USA  
13 Sberma13@terpmail.umd.edu

14 Sara Bender-Bier  
15 Division of Applied Mechanics, U. S. FDA/CDRH  
16 Silver Spring, MD 20993 USA  
17 Sara.benderbier@gmail.com

18

19 Gavin D'Souza  
20 Division of Applied Mechanics, U. S. FDA/CDRH  
21 Silver Spring, MD 20993 USA  
22 Gavin.dsouza@fda.hhs.gov

23

24 Matthew Myers\*  
25 Division of Applied Mechanics, U. S. FDA/CDRH  
26 Silver Spring, MD 20993 USA  
27 Matthew.myers@fda.hhs.gov

28

29

30

31 **Abstract**

32 Retrospective analyses of interventions to epidemics, in which the effectiveness of strategies  
33 implemented are compared to hypothetical alternatives, are valuable for performing the cost-  
34 benefit calculations necessary to optimize infection countermeasures. SIR (susceptible-infected-  
35 removed) models are useful in this regard but are limited by the challenge of deciding how and  
36 when to update the numerous parameters as the epidemic changes in response to population  
37 behaviors. We present a method that uses a “dynamic spread function” to systematically capture  
38 the continuous variation in the population behavior, and the gradual change in infection dynamics,  
39 resulting from interventions. No parameter updates are made by the user. We use the tool to  
40 quantify the reduction in infection rate realizable from the population of New York City adopting  
41 different facemask strategies during COVID-19. Assuming a baseline facemask of 67% filtration  
42 efficiency, calculations show that increasing the efficiency to 75% could reduce the roughly 5000  
43 new infections per day occurring at the peak of the epidemic to 3000. Mitigation strategies that  
44 may not be varied as part of the retrospective analysis, such as social distancing, are automatically  
45 captured as part of the calibration of the dynamic spread function.

46 Key words: COVID-19, SIR model, Infection-spread model, personal protective equipment,  
47 facemask

48

## 49 **1.Introduction**

50 Retrospective analyses of strategies used to contain epidemics such as COVID-19 are valuable for  
51 countering successive waves of the infection, selecting countermeasures for future epidemics, and  
52 educating the population regarding the efficacy of implementing certain behavioral modifications.  
53 In particular, public-health agencies responsible for recommending types of personal protective  
54 equipment (PPE) to stockpile in anticipation of a future pandemic can benefit greatly from the  
55 cost-benefit information yielded by retrospective analyses. Mathematical models, including those  
56 of the SIR type, can be helpful in providing a quantitative framework for the analyses. SIR  
57 models have been applied during the COVID-19 pandemic<sup>1,2,3,4</sup>, primarily in a predictive capacity.  
58 To our knowledge, no studies have attempted to re-create an actual scenario (e.g. CNYC) with  
59 different interventions, though in Cooper et al.<sup>4</sup> the influence of different mask types on the  
60 reproduction number was computed using a generic infection scenario. A formidable challenge in  
61 applying SIR models is prescribing the values of the numerous parameters, and updating them to  
62 simulate evolving infection dynamics, as population behaviors change in response to  
63 interventions. Typically, the behaviors change in a continuous manner, as in the gradual adoption  
64 of face masks by an affected population. Such gradual changes are difficult to capture by  
65 periodically adjusting the parameters characterizing the behaviors. The challenge is further  
66 accentuated by the high sensitivity of the predictions to some of the parameter values<sup>2</sup>. Often,  
67 parameter choices are based upon best guesses, or closeness of fit (sometimes visual) of computed  
68 profiles with published curves<sup>4</sup>.

69 In this paper we introduce a modification of traditional SIR models that incorporates a “dynamic  
70 spread” function that captures changes in population behavior in a continuous manner. There is no  
71 need to adjust parameters as interventions are implemented during the course of the infection. The

72 spread function satisfies a differential equation with variable coefficients obtained from published  
73 infection curves for the epidemic under study. The computed spread function reproduces the  
74 infection dynamics resulting from a given intervention strategy. Subsequently, the spread function  
75 can be systematically modified to analyze the effect of alternate intervention strategies. We  
76 illustrate the process using the COVID-19 crisis in New York City (CNYC). The reduction in  
77 infection rate realizable in CNYC with an increased level of mask usage, and with deployment of  
78 masks offering higher levels of filtration, is estimated.

## 79 **2. Methods**

80 We illustrate the technique using a 3-equation SIR model. It assumes that the infection dynamics  
81 are dominated by one transmission mode (e.g. airborne particulates), and that the parameter values  
82 are appropriate for all particle sizes contributing to that mode (though interpretation of the  
83 resulting equations as an average for a broad particle distribution is possible<sup>5</sup>). More complicated  
84 SIR models can be useful, particularly if it is desired to model the details of the infection dynamic,  
85 e.g. symptomatic and asymptomatic individuals<sup>1</sup>. Our intention is to use the simplest model that  
86 can capture the known infection dynamics in a general sense, with the hope that the model can be  
87 understood and used by non-experts such as policy makers. Additionally, as noted by Siegenfeld  
88 et al.<sup>6</sup>, simpler models can prove more useful than complex ones, in part because accurate data is  
89 often not available to inform complicated formulations. Finally, we expect that some of the  
90 technique we present can be extended to more complex models.

91

92

## 93 **2.1 Overview of Strategy.**

94 The dynamic-spread function is part of a systematic procedure for calibrating SIR models. The 5  
95 steps in the procedure are listed below and implemented subsequently.

96 1)Use the rate of change (measured by the number of new infections per day),  $dS/dt$ , of the  
97 susceptible population, as the variable for calibrating the model, rather than  $S$ . The derivative  
98 profile, which we call  $T(t)$ , was felt to be the quantity known most accurately. Its determination  
99 does not require the number of recovered patients to be tracked.

100 2)Normalize variables and identify critical dimensionless parameters. Formulating the model in  
101 terms of dimensionless quantities reduces the number of property values that must be determined,  
102 which can be numerous in SIR models<sup>7</sup>.

103 3)Allow the dimensionless parameter  $\delta$ , which is essentially the product of the infection  
104 transmission rate and the virus production rate, to vary with time, and account for its time  
105 dependence in the governing differential equation for  $T(t)$ . We denote  $\delta(t)$  the “dynamic-spread”  
106 function, as it contains the elements that both vary with time and govern the rate of spread of the  
107 infection.

108 4)Derive the governing equation for  $\delta(t)$ . Provide the required coefficient functions using  
109 published  $T(t)$  profiles for a given infection scenario.

110 5)Designate as the time origin for the dynamic analysis the point of the first intervention into the  
111 epidemic. For CNYC, we identify this as day 17 from the first reported infection, when shelter-in-  
112 place was instituted. Prior to that point, it is assumed that  $\delta$  is constant in time, and a standard

113 SIR model applies. The parameters for the standard SIR model can be estimated from the  
114 published growth rate and reproduction number. The resulting values serve as initial conditions  
115 for the dynamic analysis.

## 116 2.2 Development of Governing Equations

117 The SIR equations under these conditions listed in sections 2 and 2.1 are as follows<sup>7,5</sup>. The  
118 primes denote dimensional quantities and will be dropped following nondimensionalization.

$$119 \quad T' = \frac{dS'}{dt'} = -\tilde{\beta} D' \frac{S'}{N} \quad (1a)$$

$$120 \quad \frac{dI'}{dt'} = -\frac{dS'}{dt'} - \mu I' \quad (1b)$$

$$121 \quad \frac{dD'}{dt'} = \kappa I' - \frac{1}{\nu} D' \quad (1c)$$

122 Here  $S'$  is the number of susceptible individuals in the total population  $N$ ,  $I'$  the number of  
123 infected individuals,  $D'$  the total number of droplets,  $\tilde{\beta}$  the transmission rate,  $\mu$  the infection  
124 recovery rate,  $\kappa$  the droplet production rate, and  $\nu^{-1}$  the droplet removal rate. We next introduce  
125 the maximum number of newly reported infections (roughly 5000 per day for CNYC)  $\alpha$ , and a  
126 time scale  $\Delta$ , which we take to be the turn-around time (time required to reach  $dT'/dt' = 0$ , about  
127 37 days for CNYC.) The function  $T'$  is scaled by  $\alpha$ ,  $I'$  by  $\alpha\Delta$ , and  $D'$  by  $\kappa\alpha\Delta^2$ . Additionally, we  
128 differentiate Eq. 1a (after nondimensionalization), allowing the spread parameter

$$129 \quad \delta = \tilde{\beta} \kappa \Delta^2 \quad (1d)$$

130 to vary with time. Also, for huge populations as in CNYC, we ignore terms proportional to  
131  $\alpha\Delta/N$ , including  $S'/N - I$ . Under these assumptions, the SIR equations become:

$$132 \quad T = -\delta D, \quad \frac{dT}{dt} = \frac{T}{\delta} \frac{d\delta}{dt} - \delta \frac{dD}{dt} \quad (2a,b)$$

$$133 \quad \frac{dI}{dt} = -T - \gamma I \quad (2c)$$

$$134 \quad \frac{dD}{dt} = I - \lambda D, \quad (2d)$$

135 where  $\gamma = \Delta\mu_I$  is the dimensionless infection recovery rate and  $\lambda = \frac{\Delta}{v}$  is the dimensionless  
136 droplet removal rate. Inserting (2d) in (2b) and using (2a) yields the 2-equation system:

$$137 \quad \frac{dT}{dt} = -\delta I - \lambda T + \frac{T}{\delta} \frac{d\delta}{dt} \quad (3a)$$

$$138 \quad \frac{dI}{dt} = -T - \gamma I \quad (3b)$$

139 As noted above, we take the time origin to be the time of first intervention.

140 To determine the dynamic spread function, we reformulate Eq. (3a) as an equation for  $\delta(t)$ ,  
141 assuming  $T(t)$  and  $I(t)$  to be known. We then obtain the  $T(t)$  profile from the published number of  
142 new infections per day in the locale of interest (e.g. New York City). We label this published  
143 profile  $T_p(t)$  and the resulting (from Eq. (3b)) infection profile  $I_p(t)$ , and we insert them into the  
144 equation for  $\delta(t)$ . The resulting equation for the dynamic spread function is:

$$145 \quad \frac{d\delta}{dt} = \frac{I_p}{T_p} \delta^2 + \left( \lambda + \frac{1}{T_p} \frac{dT_p}{dt} \right) \delta \quad (4)$$

146 Because the governing equation for  $\delta(t)$  is informed by the published  $T_p(t)$  profile, solving Eq's 3  
147 using this dynamic spread function will reproduce (within numerical tolerances) the published  
148  $T_p(t)$  curve. The utility of  $\delta(t)$  derives from modifying it to model alternative intervention  
149 strategies and solving Eqs (1) to determine the modified infection rate. Modifications to account  
150 for protective strategies were performed in the following manner.

### 151 **2.3 Accounting for Protective Equipment**

152 We build upon a previously developed SIR model<sup>5,8</sup> that systematically accounts for the presence  
153 of protective equipment. Differentiating Eq. (1d) with respect to time yields

$$155 \quad \frac{d\delta}{dt} = \frac{\partial\delta}{\partial\tilde{\beta}} \frac{d\tilde{\beta}}{dt} + \frac{\partial\delta}{\partial\kappa} \frac{d\kappa}{dt} \quad (5)$$

156 Apportioning a fraction  $\epsilon_\kappa$  (e.g.  $\frac{1}{2}$ ) of the change in  $\delta$  to changes in droplet production, we set

$$157 \quad \epsilon_\kappa \frac{d\delta}{dt} = \frac{\partial\delta}{\partial\kappa} \frac{d\kappa}{dt} \quad (6)$$

158 Since from (1d)

$$159 \quad \frac{\partial\delta}{\partial\kappa} = \frac{\delta}{\kappa} \quad , \quad (7)$$

$$160 \quad \epsilon_\kappa \frac{d\delta}{dt} = \frac{\delta}{\kappa} \frac{d\kappa}{dt} \quad , \quad (8)$$



161 which can be integrated to

$$162 \quad \kappa(t) = \kappa(0) [\delta(t)/\delta(0)]^{\epsilon\kappa} \quad . \quad (9)$$

163 In Myers et al<sup>5</sup>, it was shown that the production rate in the presence of protective equipment can  
164 be written as

$$165 \quad \kappa(t) = \kappa(0)[1 - FE * f_i(t)] \quad . \quad (10)$$

166 Here FE is the filtration efficiency (e.g. the FE for an N95 respirator is 95%) of the mask for the  
167 dominant droplet size, and  $f_i$  is the fraction of the infected population wearing the covering at any  
168 given time. To perform a retrospective analysis in which a barrier material of different capturing  
169 efficiency is investigated, the new FE value would be used in Eq. (10) which, with Eq. (9), would  
170 be used to create a new dynamic-spread function. The modified spread function would then be  
171 used (in Eqs (3)) to estimate the change in infection rate.

172 To analyze scenarios where different fractions of the infected population deploy a given mask  
173 type, Eqs. (9) and (10) can be combined to give

$$174 \quad [\delta(t)/\delta(0)]^{\epsilon\kappa} = 1 - FE * f_i(t) \quad , \quad (11)$$

175 and

$$176 \quad f_i(t) = \frac{1 - [\delta(t)/\delta(0)]^{\epsilon\kappa}}{FE} \quad (12)$$

177 Eq. (12) can be used to estimate the fraction of infected individuals deploying a mask of a given  
178 filtration efficiency for a baseline case (known  $\delta(t)$ ). The effect of different fractions of the

179 infected population deploying the mask can be quantified by prescribing  $f_i(t)$ , solving for  $\delta(t)$ , and  
180 using this modified spread function in Equations (3).

## 181 **2.4 Solution Technique**

182 The initial conditions for Equations (3) are obtained by simulating the dynamics of the infection  
183 prior to any intervention, days 1 – 17 for CNYC. In that case, the derivative of the spread function  
184 is zero and Equations (3a,b) revert to a traditional SIR model. Seeking solutions that have an  
185 exponential time dependence of the form  $exp(Mt)$  result in the algebraic equation

186

$$187 \quad 2 * M = -(\lambda + \gamma) \pm [(\lambda + \gamma)^2 + 4\delta_0]^{1/2} \quad . \quad (13)$$

188 The subscript “0” on  $\delta$  implies that the value applies to the initial period of the infection, before  
189 intervention occurs. The other parameters do not vary during the course of the epidemic and are  
190 not subscripted. An exponentially growing solution will occur when

$$191 \quad \frac{\delta_0}{\gamma\lambda} > 1 \quad (14)$$

192 The ratio  $\delta_0/(\gamma\lambda)$  is the reproduction number  $R_0$ <sup>5</sup> for the standard SIR model. The growth rate  $M$   
193 can be obtained from infection rates published during the beginning of the infection. Estimates of  
194 the reproduction numbers  $R_0$  for the early stages of epidemics are also published. In the  
195 simulations, a range of recovery times  $\mu_I$  (dimensionless recovery times  $\gamma$ ) ranging from 2 days to  
196 10 days were considered. For any given value of  $\gamma$ ,  $\lambda$  and  $\delta_0$  were obtained from Eqs (13) and (14)  
197 and used in the solution of the dynamic equations (3). The initial value for  $T(t)$  was obtained from

198 the published profile  $T_p(t)$  (published number of new infections per day<sup>9</sup>), evaluated at day 17.  
199  $I_p(t)$  was derived from  $T_p(t)$  using Eq. (3b), rather than using a published infection profile, so that  
200 it was not necessary to ascertain how well recoveries were tabulated in the published infection  
201 curves. The  $I_p(t)$  function evaluated at day 17 was used to provide the initial condition for  $I(t)$ .  
202 Equations (3) were solved using a Runge-Kutta method (Matlab *ode45*, Mathworks Inc.).

### 203 **3. Results**

204 We performed a retrospective analysis of CNYC during days 17 - 37 . This interval was chosen  
205 because day 17 is the day of the first intervention (shelter in place), and day 37 is the time of  
206 maximum new infections per day, based upon a 7-day average<sup>9</sup> . Initial reproduction numbers  
207 between 2 and 6 were considered, along with recovery times between 2 days and 10 days. The  
208 fraction  $\epsilon_k$  was  $\frac{1}{2}$ . We analyzed scenarios where the infected population deployed different types  
209 of masks. For baseline, it was assumed that the FE was 67%. This value is representative of  
210 homemade masks<sup>10</sup>, though the filtration capability of homemade masks spans a wide range.  
211 Higher-efficiency masks with FE's of 75%, 80%, and 90% were considered for the hypothetical  
212 scenarios. Uncertainty in the calculated results was obtained by performing simulations for  
213 different combinations of reproduction numbers and recovery rates and computing the mean and  
214 standard deviation for the ensemble of parameter combinations.

215 Figure 1a shows the dynamic spread function as a function of time. A sharp decrease is seen

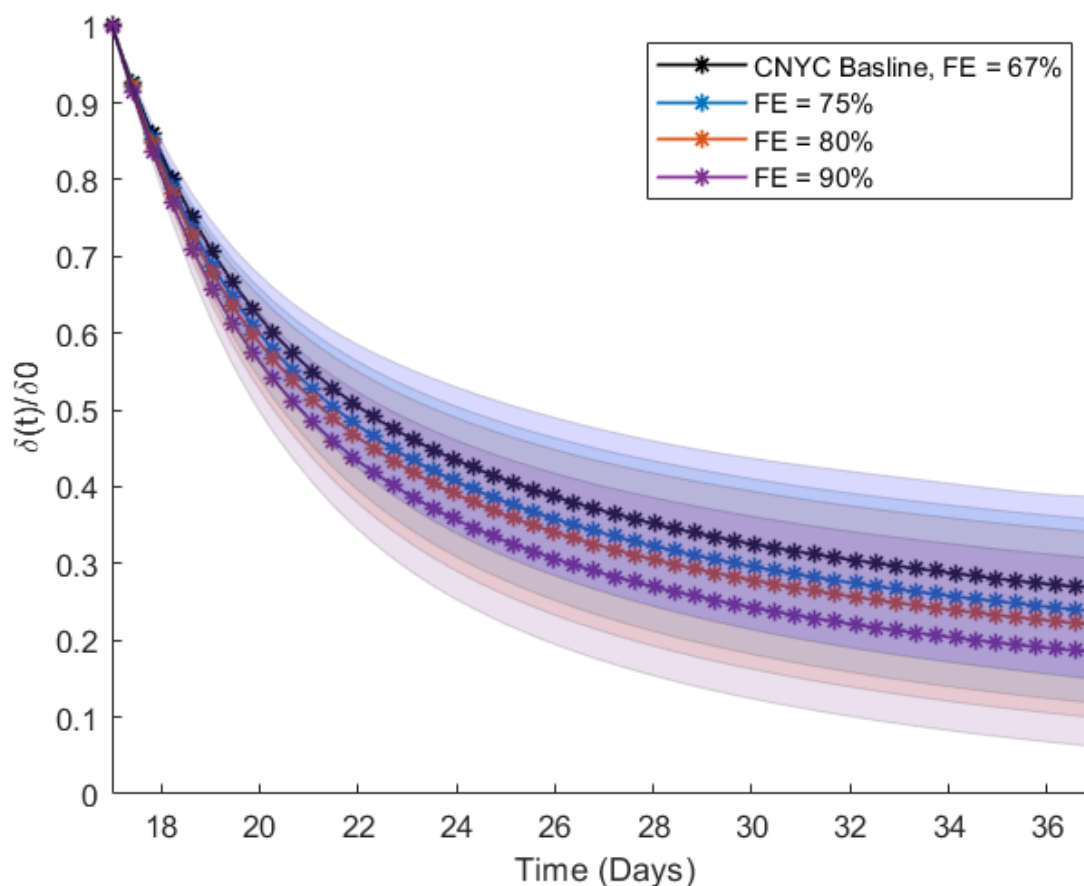

216

217 Figure 1a. Dynamic spread function for CNYC with infected population deploying masks with  
218 different filtration efficiencies. Shaded regions denote values within a standard deviation of the  
219 mean, for an ensemble of simulations using different reproduction numbers and recovery rates.

220

221 initially, owing to the shelter-in-place restriction. For larger FE, a sharper decrease in the spread  
222 function is observed. A large decrease in new infections (Fig. 1b) accompanies a small reduction  
223 in spread function value. Increasing FE from 67% to 75% , for example, reduces the spread  
224 function value about 10% at day 37, and maximum number of new infections (at day 37)  
225 decreases by about 40%. The turn-around time is decreased from about 37 days to 32 days.

226

227

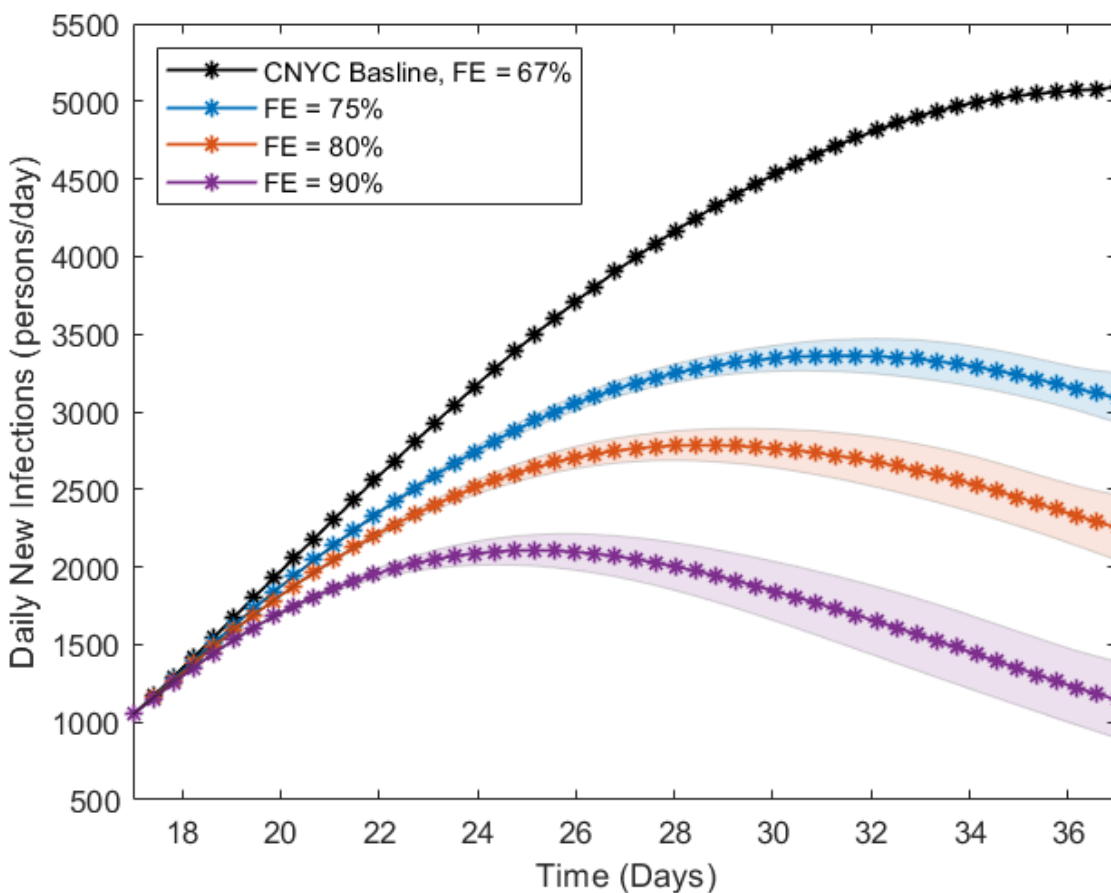

228

229 Figure 1b. Number of new infections per day for CNYC, with infected population deploying  
230 masks with different filtration efficiencies. Shaded regions denote values within a standard  
231 deviation of the mean, for an ensemble of simulations using different reproduction numbers and  
232 recovery rates.

233

234 For the same increase of FE from 67% to 75% , the number of infected individuals (Fig. 1c) at day  
235 37 is reduced by about 30%. The uncertainty is considerably larger for the spread function (Fig  
236 1a) and the infected population (Fig. 1c) than the number of new infections per day (Figure 1b),

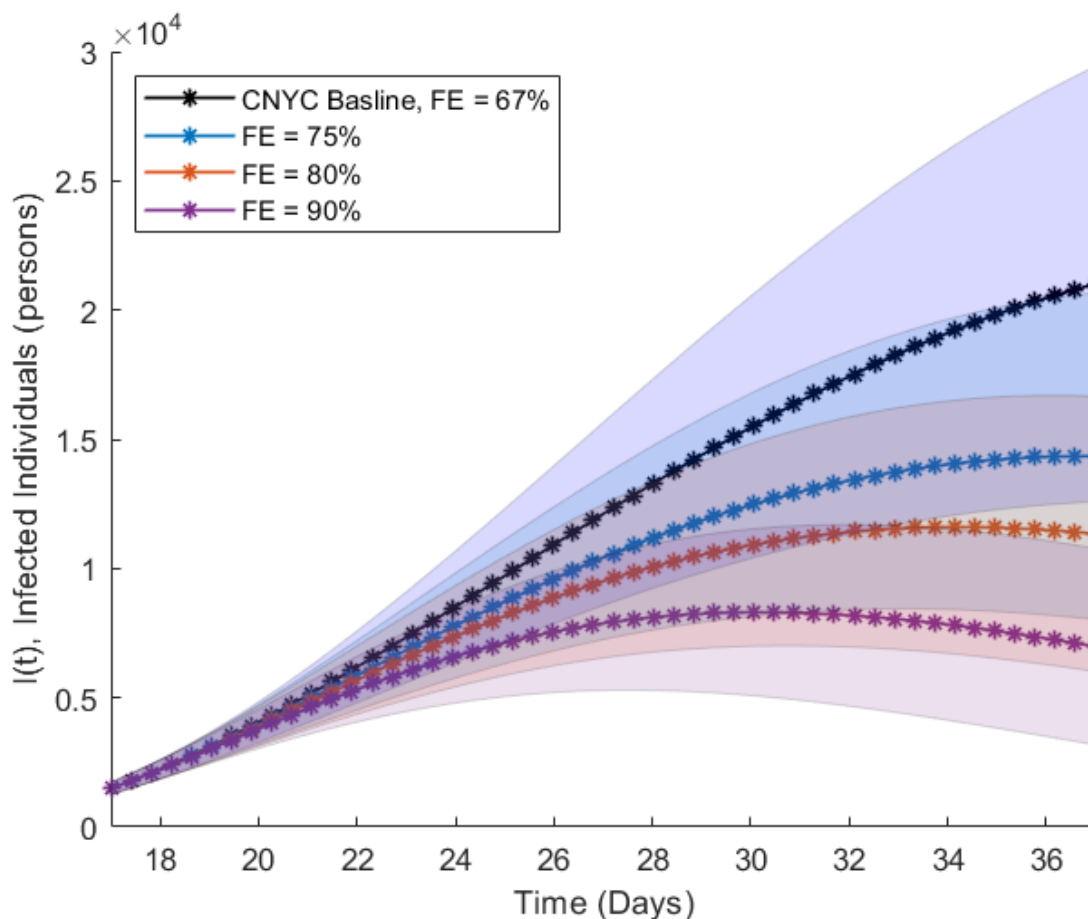

237

238 Figure 1c. Infected population as a function of time for CNYC, when infected population deploys  
239 masks of different filtration efficiencies. Shaded regions denote values within a standard  
240 deviation of the mean, for an ensemble of simulations using different reproduction numbers and  
241 recovery rates.

242

243 as the spread function and infected population are much more strongly influenced by the recovery  
244 time than the number of new infections. The recovery time spanned a factor of 5 over all the  
245 simulations performed.

246 An additional set of simulations was performed in which the fraction of the CNYC population  
247 wearing a mask with a filtration efficiency of 0.67 was increased, by 2%, 5%, and 10%. The

248 baseline fraction deploying the mask was determined from Eq. (12), with  $\delta(t)$  (baseline curve in  
249 Fig. 1a) derived from Eq. (4). The fraction deploying the mask increased from 0% at day 17 to  
250 roughly 75% on day 37. Increasing the fraction by 10% (i.e. multiplying the  $f_i$  value at each time  
251 by 1.1) reduced the number of new infections per day from about 5100 to 3600 (Fig. 2). The turn-  
252 around time is reduced from approximately 37 days to 32 days.

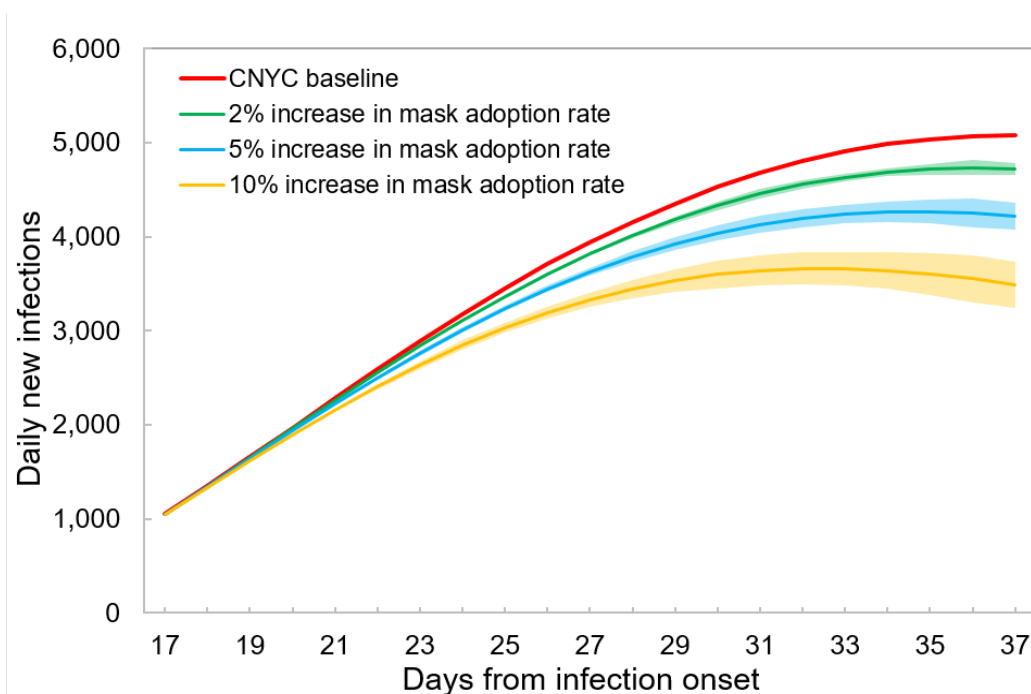

253

254 Figure 2. Number of new infections per day for scenarios where various fractions of the infected  
255 population in CNYC deploy masks with a 67% filtration efficiency.

256

#### 257 4. Discussion

258 While days 17 to 37 were featured in our simulations, the dynamic-spread-function technique can  
259 be applied to any time interval where reliable numbers of new infections are available. The  
260 standard SIR model is used prior to the time when either the production rate or the transmission

261 rate is altered by an intervention strategy. At that point the dynamic simulations commence, with  
262 the SIR results serving as initial conditions.

263 The model is not intended to be a predictive tool, in the sense of forecasting the future course of an  
264 ongoing epidemic. The purpose of the model is to compare different intervention strategies for  
265 scenarios where the baseline infection profile (number of new infections per day) is provided.

266 Also required are the initial reproduction number and an estimate of the recovery rate. Though the  
267 model is not a forecasting tool, it can be useful for designing future countermeasures, particularly  
268 if elements of the anticipated scenario are similar to those of the scenario used to compute the  
269 spread function  $\delta(t)$ . These elements include, most importantly, population behaviors such as face

270 mask adoption (affecting both  $\kappa$  and  $\tilde{\beta}$  in Eq. 5) and social distancing (affecting  $\tilde{\beta}$ ), but also

271 environmental factors such as the pathogen inactivation rate. We refer the reader to Stilianakis  
272 and Drossinos<sup>7</sup> for the dependence of infection dynamics on the numerous properties of the

273 pathogen, the population, and the environment. Here we emphasize that the spread function

274 implicitly captures the influence of all these factors, even though the functional dependence of the  
275 parameters is not introduced. Only when considering an alternative scenario that varies one of the

276 factors does the explicit parametric dependence matter. In this paper, the functional

277 dependence of the production rate  $\kappa$  upon the mask filtration efficiency is introduced via Eq. (10)

278 in order to evaluate different PPE strategies.

279 Calibration of the model is based upon number of new infections, rather than the size of the

280 infected population, to eliminate the uncertainty associated with how well recoveries are tracked in

281 the calibration dataset. To compare with published data sets where recoveries are not accounted



282 for, then the integral of  $T(t)$  (converted to dimensional form) up to the time point of interest would  
283 be the proper metric for representing the size of the infected population.

284 Since the dynamic spread function is the product of the transmission rate times the droplet  
285 production rate, it quantifies the ability of the infection to spread. The ability of the infection to  
286 spread decreased rapidly from day 17 (Fig. 1a). Because adoption of masks in CNYC likely  
287 occurred on a continuous basis over the weeks succeeding day 17, the curves in Fig. 1a are smooth  
288 and monotonically decreasing. For longer periods of time, where mask usage may eventually  
289 decrease, the spread function need not be monotonic.

290 The effects of different protective-equipment strategies in CNYC were investigated without  
291 having to update the SIR parameters during the epidemic. The continuous adoption of masks  
292 would be difficult to simulate by updating coefficients at various times in standard SIR models.  
293 With the dynamic-spread approach, the gradual adoption of masks is captured in a natural manner.

294 As noted above, the dynamic-spread approach allowed social distancing to be captured without  
295 being specifically modeled. The pattern of social distancing in CNYC was retained for all the  
296 simulated scenarios involving different facemasks. This commonality is largely responsible for  
297 the similar shapes of the curves in Fig. 1a. The only decision made relative to social distancing  
298 was that the factors contained in the transmission rate ( $\tilde{\beta}$ ), which includes social distancing<sup>5,7</sup>,  
299 were responsible for roughly half ( $\epsilon_k = 1/2$ ) of the reduction in the spread function (shown in Fig.  
300 1a). Other fractions would result in different reductions in infection in Figs 1 and 2, with higher  
301 values of  $\epsilon_k$  resulting in larger reductions in infection rate, and vice versa.

302 The simulated scenarios addressed only changes in masks worn by the infected population. No  
303 change in protection for the susceptible population was assumed. The susceptible population  
304 deployed masks, but the type was not varied between scenarios. As shown in Myers et al.<sup>5</sup>, the  
305 effect of mask deployment by the susceptible population can be simulated by modifying the  
306 transmission term ( $\tilde{\beta}(t)$ ) in Eq. (3), using equations analogous to (9) and (10).

307 For the conditions of the simulations, a slight increase in facemask efficiency resulted in a larger  
308 benefit than a commensurate increase in compliance. At day 37, for example, a fractional increase  
309 in compliance of 0.1 resulted in a reduction in new infections of about 1500 per day (Fig. 2), while  
310 a fractional increase in FE of 0.1 reduced the number of new infections by about 1800  
311 (interpolating Fig. 1b). For a higher baseline FE than 67%, increasing the compliance rate would  
312 produce a larger decrease in new infections. This comparison between filter efficiency and  
313 population compliance illustrates the utility of the model for determining how resources devoted  
314 to countermeasures can be optimally spent. In this case, the model can help inform the choice  
315 between 1) producing and distributing barriers of higher FE, and 2) educating and incentivizing  
316 the population to deploy barriers more readily available.

317 A noteworthy conclusion emerging from the simulations is that considerable benefit can be  
318 obtained from higher FE masks without requiring N95 levels of efficiency (Fig 1). It is important  
319 to emphasize that for the benefits to be realized, the filtration efficiencies for the barrier material  
320 must be attainable for the particle-size range of the dominant transmission mode for the given  
321 scenario. One way of assuring this is for the barrier to provide the given FE across the spectrum  
322 of particle sizes. Otherwise, knowledge of the material filtration efficiency for the intended  
323 application (e.g. reducing airborne particulates generated by coughing or sneezing by infected

324 persons indoors) is required in order to generate useful estimates. The complex issues of  
325 dominant transmission mode for COVID-19, and the filtration efficiency of different masks  
326 designs for the different modes, will be addressed in future applications of the model.

327

## 328 **Data Availability**

329 Data used to inform the model was obtained from the Johns Hopkins Coronavirus Resource  
330 Center (2020), <https://coronavirus.jhu.edu/map.html>.

331

## 332 **References**

- 333 1. Stutt, R. O. J. H., Retkute, R., Bradley, B., Gilligan, C. A. & Colvin, J. A modelling framework  
334 to assess the likely effectiveness of facemasks in combination with ‘lock-down’ in managing the  
335 COVID-19 pandemic. *Proc. R. Soc.A* **476**: 20200376. [doi:10.1098/rspa.2020.0376](https://doi.org/10.1098/rspa.2020.0376)
- 336 2. Giordano, G., Blanchini, F., Bruno, R., Colaneri, P., Di Filippo, A., Di Matteo, A. & Colaneri,  
337 M. Modelling the COVID-19 epidemic and implementation of population-wide interventions in  
338 Italy. *Nature Medicine Let.* doi:10.1038/s41591-020-0883-7
- 339 3. Bertozzi, A. L., Franco, E., Mohlerd, G., Shorte, M. B. & Sledge, D. The challenges of  
340 modeling and forecasting the spread of COVID-19. *Proc. Nat. Acad. Sci* **117**, 16732–16738  
341 (2020).

- 342 4. Cooper, I., Mondal, A., & Antonopoulos, C. A SIR model assumption for the spread of  
343 COVID-19 in different communities. *Chaos, Solitons, and Fractals*, 2020.  
344 doi:10.1016/j.chaos.2020.110057  
345
- 346 5. Myers, M., Yan, J., Hariharan, P., Guha, S. A Mathematical Model for Assessing the  
347 Effectiveness of Protective Devices in Reducing Risk of Infection by Inhalable Droplets.  
348 *Mathematical Medicine and Biology*, October 2016, <https://doi.org/10.1093/imammb/dqw018> .  
349
- 350 6. Siegenfeld, A. F., Taleb, N. N. & Bar-Yam, Y. What models can and cannot tell us about  
351 COVID-19. *Proc. Nat. Acad. Sci. U.S.A.* **117**, 16092-16095 (2020).
- 352 7. Stilianakis, N. I. & Drossinos, Y. Dynamics of infectious disease transmission by inhalable  
353 respiratory droplets. *J. Royal Society Interface* **7**, 1355–1366 (2010).
- 354 8. Yan, J., Hariharan, P., Guha, S., Myers, M. Modeling the effectiveness of respiratory protective  
355 devices in reducing influenza outbreak. *Risk Analysis*, September 2018. [doi:10.1111/risa.13181](https://doi.org/10.1111/risa.13181) .
- 356 9. Johns Hopkins Coronavirus Resource Center (2020) <https://coronavirus.jhu.edu/map.html>.  
357
- 358 10. Howard, J., Huang, A., Lik, Z., et al., Face Masks Against COVID-19: An Evidence Review.  
359 *Proc. Nat. Acad. Sci. U.S.A.* (2020).DOI: 10.20944/preprints202004.0203.v2  
360

### 361 **Author Contributions**

362 JO and GD developed the computer code and performed the simulations. SB helped derive the  
363 governing equations and generated analytical solutions used to verify computations. SBB

364 researched COVID-19 databases and performed operations to optimize data use by the model.

365 MM designed the study. All authors contributed to the writing and editing of the manuscript.

366

### 367 **Competing Interest Statement**

368 The authors have no competing interests to report.

369

370

### 371 **Figure Legends**

372 1a. Dynamic spread function for CNYC with infected population deploying masks with different  
373 filtration efficiencies. Shaded regions denote values within a standard deviation of the mean,  
374 for an ensemble of simulations using different reproduction numbers and recovery rates.

375 1b. Number of new infections per day for CNYC, with infected population deploying masks with  
376 different filtration efficiencies. Shaded regions denote values within a standard deviation of the  
377 mean, for an ensemble of simulations using different reproduction numbers and recovery rates.

378 1c. Infected population as a function of time for CNYC, when infected population deploys masks  
379 of different filtration efficiencies. Shaded regions denote values within a standard deviation of  
380 the mean, for an ensemble of simulations using different reproduction numbers and recovery rates.

381 2. Number of new infections per day for scenarios where various fractions of the infected  
382 population in CNYC deploy masks with a 67% filtration efficiency.

383

384

385

386

387
